# Supplementary material for: Ginsenoside Rh2 Ameliorates Atopic Dermatitis in NC/Nga Mice by Suppressing NF-kappaB-Mediated Thymic Stromal Lymphopoietin Expression and T Helper Type 2 Differentiation
Source: Int J Mol Sci. 2019 Dec 4;20(24):6111. doi: 10.3390/ijms20246111 (PMC6940811; doi:10.3390/ijms20246111)
Supplement: Supplementary file 1 [file ijms-20-06111-s001.pdf]

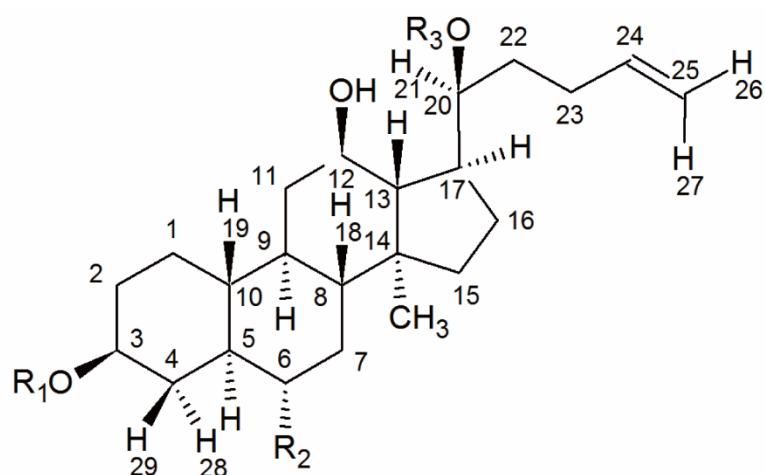

| Ginsenoside            | R <sub>1</sub> | R <sub>2</sub>  | R <sub>3</sub> |
|------------------------|----------------|-----------------|----------------|
| Compound K (C-K)       | H-             | H-              | Glc-           |
| F1                     | H-             | HO-             | Glc-           |
| F2                     | Glc-           | H-              | Glc-           |
| Gypenoside XVII (G17)  | Glc-           | H-              | Glc(1→6)Glc-   |
| Gypenoside LXXV (G75)  | H-             | H-              | Glc(1→6)Glc-   |
| Protopanaxadiol (PPD)  | H-             | H-              | H-             |
| Protopanaxatriol (PPT) | H-             | HO-             | H-             |
| Rb1                    | Glc(1→2)Glc-   | H-              | Glc(1→6)Glc-   |
| Rb3                    | Glc(1→2)Glc-   | H-              | Xyl(1→6)Glc-   |
| Rc                     | Glc(1→2)Glc-   | H-              | Araf(1→6)Glc-  |
| Rd                     | Glc(1→2)Glc-   | H-              | Glc-           |
| Re                     | H-             | Rha(1→2)-Glc-O- | Glc-           |
| Rg1                    | H-             | Glc-O-          | Glc-           |
| Rg2                    | H-             | Rha(1→2)-Glc-O- | H-             |
| Rg3                    | Glc(2→1)Glc-   | H-              | H-             |
| Rh1                    | H-             | Glc-O-          | H-             |
| Rh2                    | H-             | H-              | Glc-           |

Glc : Glucopyranoside; Rha : Rhamnopyranoside; Xyl : Xylopyranoside; Araf : Arabinofuranoside

**Figure S1.** Chemical structure of ginsenosides.

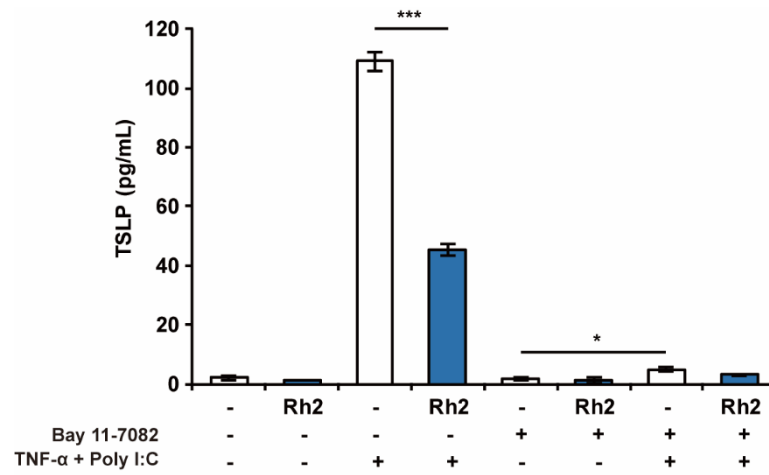

**Figure S2.** NHKs were treated with 10  $\mu$ M of Bay 11-7082 for 30 min, followed by treatment with DMSO (vehicle control) or Rh2 (5  $\mu$ M) while co-stimulating with 20 ng/mL TNF- $\alpha$  and 100  $\mu$ g/mL Poly I:C for 24 h. Production of TSLP in the cell supernatant was measured by ELISA. \* $p < 0.05$ , \*\*\* $p < 0.001$ .  $n = 3$ .
